# Supplementary material for: A facile method to prepare reduced graphene oxide with nano-porous structure as electrode material for high performance capacitor
Source: Royal Society of Chemistry journal article supplement (doi:10.1039/c6ra02997c), 2016-01-01
Supplement: c6ra02997c1.pdf [file c6ra02997c1.pdf]

## Supplementary Material

A facile method to prepare reduced graphene oxide with nano-porous structure as electrode materials for high performance capacitors

Nian Yang<sup>a</sup>, Xiaoyang Xu<sup>a</sup>, Lingzhi Li<sup>a</sup>, Heya Na<sup>a</sup>, Huan Wang<sup>a</sup>, Xuefang Wang<sup>a</sup>,

Fubao Xing<sup>a,b,\*</sup>, Jianping Gao<sup>a,b,†</sup>

<sup>a</sup>School of Science, Tianjin University, Tianjin 300072, P R China

<sup>b</sup>Collaborative Innovation Center of Chemical Science and Engineering, Tianjin 300072, P R China

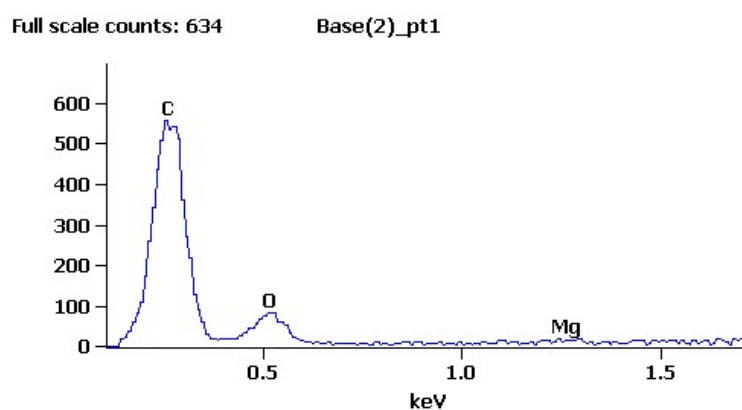

Figure S1 EDX spectra of M-rGO

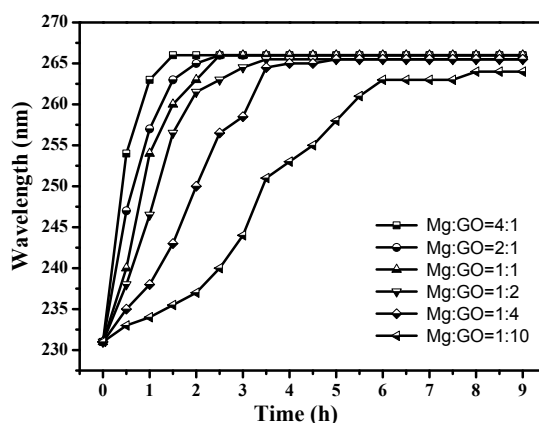

Figure S2 The reduction of GO at different Mg/GO ratio

\* Corresponding author. Tel.: (+86)15522461762; Fax: (+86)22-2740-3475.  
E-mail address: fbxing@sohu.com (F.B. Xing), jianpinggaols@126.com (J.P. Gao).

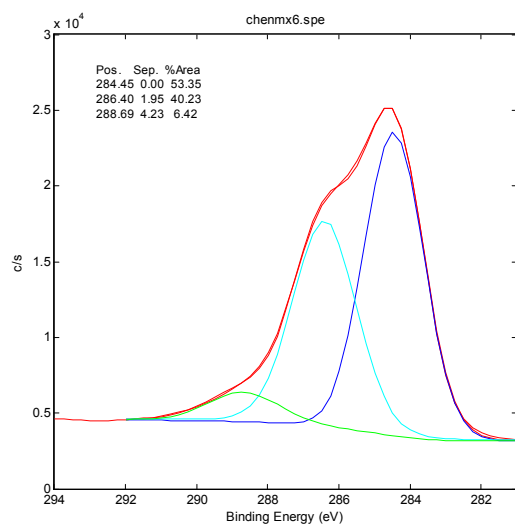

**Figure S3** The C1s spectra of GO

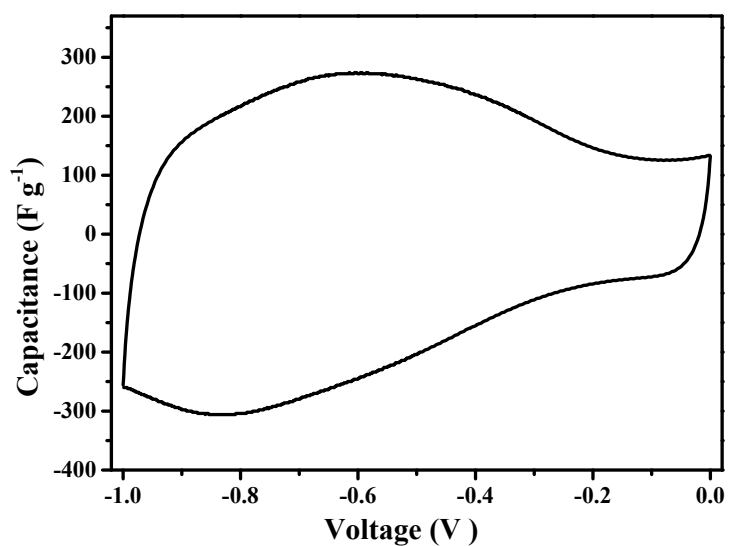

**Figure S4** CV trace of M-rGO recorded at 500 mV s<sup>-1</sup>

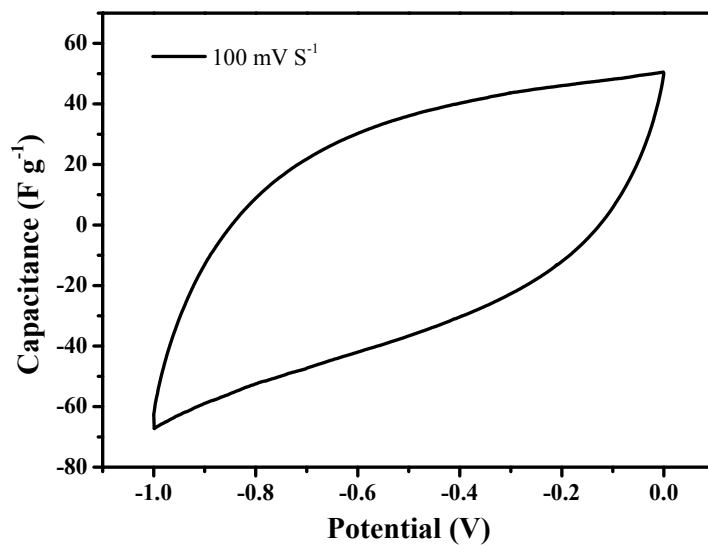

**Figure S5** CV trace of rGO electrode prepared by hydrazine reduction recorded at a scan rate of  $100 \text{ mV s}^{-1}$

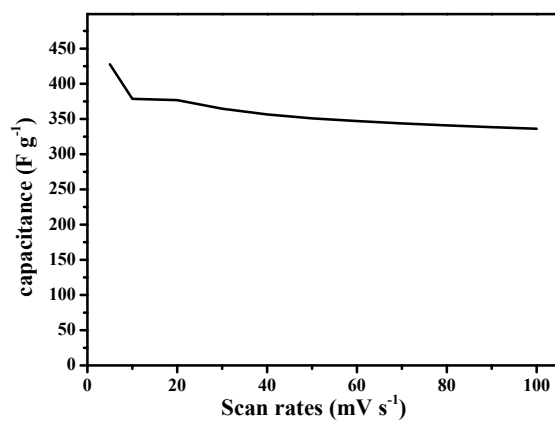

**Figure S6** Scan rate dependent specific capacitance of M-rGO electrode measured in  $1 \text{ M H}_2\text{SO}_4$ .

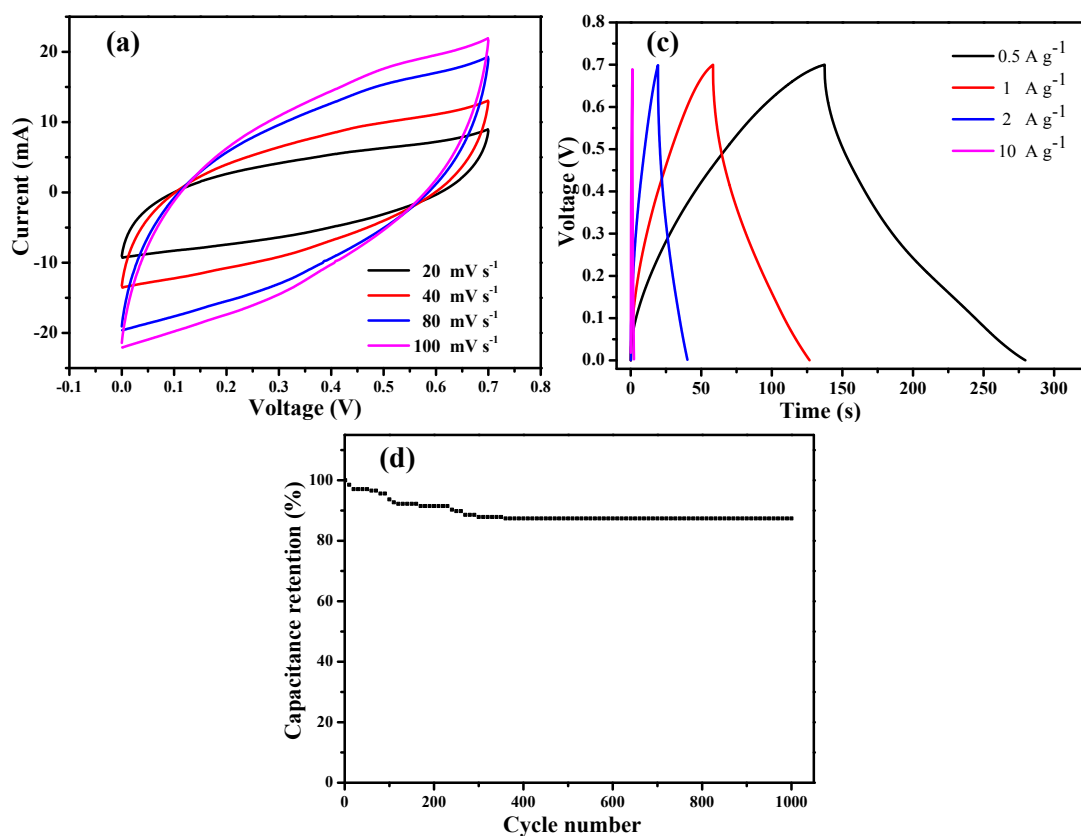

**Figure S7** Capacitance performance of M-rGO measured in a two-electrode system. (a) CV trace of M-rGO electrode recorded between 0 and 0.7 V at different scan rates; (b) galvanostatic charge-discharge curves of M-rGO at different current densities; (c) Capacitance retention of the M-rGO electrode at a constant current density of 2 A g<sup>-1</sup>.
